RESEARCH ARTICLE

# Regional Inequalities in Lung Cancer Mortality in Belgium at the Beginning of the 21st Century: The Contribution of Individual and Area-Level Socioeconomic Status and Industrial Exposure

Paulien Hagedoorn\*, Hadewijch Vandenheede, Didier Willaert, Katrien Vanthomme, Sylvie Gadeyne

Interface Demography, Department of Sociology, Faculty of Economic and Social Sciences and Solvay Business School, Vrije Universiteit Brussel, Brussels, Belgium

\* [Paulien.hagedoorn@vub.ac.be](mailto:Paulien.hagedoorn@vub.ac.be)

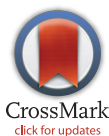

OPEN ACCESS

**Citation:** Hagedoorn P, Vandenheede H, Willaert D, Vanthomme K, Gadeyne S (2016) Regional Inequalities in Lung Cancer Mortality in Belgium at the Beginning of the 21st Century: The Contribution of Individual and Area-Level Socioeconomic Status and Industrial Exposure. PLoS ONE 11(1): e0147099. doi:10.1371/journal.pone.0147099

**Editor:** Yiping Zhang, Tsinghua University, CHINA

**Received:** July 9, 2015

**Accepted:** December 29, 2015

**Published:** January 13, 2016

**Copyright:** © 2016 Hagedoorn et al. This is an open access article distributed under the terms of the [Creative Commons Attribution License](https://creativecommons.org/licenses/by/4.0/), which permits unrestricted use, distribution, and reproduction in any medium, provided the original author and source are credited.

**Data Availability Statement:** Data are from a census-linked mortality follow-up study and cannot be made available due to privacy issues. Researchers can gain full access to the data by submitting an application to the Privacy Commission Belgium. In order to get permission to use data from the Belgian population register linked to census data an authorization request (in Dutch or French) needs to be submitted to the Belgian Privacy Commission. The authorization request includes an application form and additional forms regarding data security. The necessary forms for the authorization request can be

## Abstract

Being a highly industrialized country with one of the highest male lung cancer mortality rates in Europe, Belgium is an interesting study area for lung cancer research. This study investigates geographical patterns in lung cancer mortality in Belgium. More specifically it probes into the contribution of individual as well as area-level characteristics to (sub-district patterns in) lung cancer mortality. Data from the 2001 census linked to register data from 2001–2011 are used, selecting all Belgian inhabitants aged 65+ at time of the census. Individual characteristics include education, housing status and home ownership. Urbanicity, unemployment rate, the percentage employed in mining and the percentage employed in other high-risk industries are included as sub-district characteristics. Regional variation in lung cancer mortality at sub-district level is estimated using directly age-standardized mortality rates. The association between lung cancer mortality and individual and area characteristics, and their impact on the variation of sub-district level is estimated using multilevel Poisson models. Significant sub-district variations in lung cancer mortality are observed. Individual characteristics explain a small share of this variation, while a large share is explained by sub-district characteristics. Individuals with a low socioeconomic status experience a higher lung cancer mortality risk. Among women, an association with lung cancer mortality is found for the sub-district characteristics urbanicity and unemployment rate, while for men lung cancer mortality was associated with the percentage employed in mining. Not just individual characteristics, but also area characteristics are thus important determinants of (regional differences in) lung cancer mortality.

downloaded from the Privacy Commission website ([www.privacycommission.be](http://www.privacycommission.be)). Next to information on the applicant and a list of requested data, the authorization request should specify why the data from the population register are necessary, for which time span data will be stored, and who will have access to the data.

**Funding:** This research was funded by the Research Foundation Flanders (FWO) (Grant G025813N). The funders had no role in study design, data collection and analysis, decision to publish, or preparation of the manuscript.

**Competing Interests:** The authors have declared that no competing interests exist.

## Introduction

Lung cancer is one of the most common cancers worldwide. In 2002 an estimated 1.18 million lung cancer deaths were recorded, accounting for 18% of cancer deaths and 2% of total mortality [1]. In Belgium, lung cancer mortality is relatively low among women, but steadily expanding and expected to increase in the future [2]. Belgian men have the highest lung cancer mortality rates of Western Europe [3]. Belgium is a densely populated area with one of Europe's highest levels of air pollution [4] and a high concentration of industry posing a risk to air, water and soil quality [5]. This high-risk setting makes Belgium an interesting study area for further research into the lung cancer epidemic.

Moving beyond the overall country-level pattern through exploring geographical differences within a country gives valuable insights into at risk areas and populations and can identify possible risk factors for increased lung cancer mortality. A recent study identified regional variation in lung cancer incidence in Belgium [6], yet little is known about regional variation in lung cancer mortality and its underlying determinants. This study therefore aims to investigate geographical patterns in lung cancer mortality in Belgium on a sub-district level and wishes to probe into the contribution of individual as well as area-level characteristics to these geographical patterns. The data consist of a unique and exhaustive dataset based on individually linked census mortality follow-up data for the total de jure population of Belgium. This enables us to study the impact of individual and area-level socioeconomic status (SES) and industrial exposure on lung cancer mortality, both at the individual and sub-district level.

As for individual socioeconomic characteristics, multiple studies have found a strong socioeconomic gradient in lung cancer incidence and mortality with increased risks among individuals with a lower SES [7,8]. Additionally, at an individual level, several occupational carcinogenic agents have been associated with lung cancer, including asbestos, arsenic, beryllium, cadmium, chromium, nickel, silica and diesel engine exhaust [9,10]. Differences in lifestyle, especially smoking, and occupational exposure are possible pathways through which individual characteristics might impact lung cancer mortality [8].

At the regional level, there are three main factors resulting in regional mortality variations. The first is the compositional effect of individual characteristics, whereby individuals with certain characteristics are clustered spatially [11]. Secondly, the contextual socioeconomic characteristics of the neighborhood and living environment also appear to influence health and all-cause mortality, independently from individual SES [12,13]. This effect of area-SES has also been found for cancer mortality [14–16] and lung cancer mortality [14,16–18], although some studies found little or no effect of area deprivation on lung cancer mortality [15,19]. Thirdly, physical environmental factors could result in regional inequalities in lung cancer mortality. Individuals living close to industrial installations, especially around metal industries, cement plants and shipyards, generally experience increased lung cancer risks [20]. Residents of coal-mining areas were found to have increased levels of lung cancer mortality as well [21]. On the other hand, some studies did not find a clear association between industrial pollution and lung cancer [22,23]. Within Belgium, exposure to cadmium from local zinc smelters has been associated with increased levels of lung cancer incidence among residents of Northeast Belgium [24].

There have been ample studies looking into the effects of individual SES [7,8] and environmental pollution on lung cancer mortality [20,24,25], but relatively little is known about the role of area SES [17]. Few studies investigated all three factors at the same time in relation to lung cancer mortality, even though studying individual- and area-level characteristics can provide valuable information about disease etiology and at-risk areas and populations. Our exhaustive dataset allows us to study the joint effects of individual and area SES and industrial exposure on lung cancer mortality in Belgium. A first aim is to identify sub-district level

variations in lung cancer mortality; a second aim is to provide explanations for observed patterns by quantifying the contributions of individual SES, urbanicity, sub-district level unemployment rate and the proportion employed in mining and in other high-risk industries.

## Material and Methods

### Data

The data consist of a linkage between the 2001 census and register data on survival status, emigration status and cause-of-death information for the period October 1, 2001 to December 31, 2011. The data cover the entire de jure population of Belgium and take all lung cancer deaths (defined by ICD-10 codes C33-C34) from 2001 to 2011 into account. As most lung cancer deaths occur at older ages, the study population is limited to men and women aged 65 years and older. The sample size consists of 1,742,356 persons (714,535 men and 1,027,821 women) and 36,099 lung cancer deaths (28,883 in men and 7,216 in women). This study was approved by the Belgian Commission for the Protection of Privacy. Individual record linkage between census and register data was conducted by Statistics Belgium, the government agency in charge of Belgian national statistics. The dataset was anonymized by Statistics Belgium before it was made available for research. All personal identifying information was thus removed from the dataset prior to analysis.

### Unit of analysis

The geographic unit of analysis used in this study is the sub-district, a manually constructed spatial unit to enable the distinction between urban and non-urban areas while ensuring geographical units large enough for robust analyses. The starting point is the administrative district (“arrondissement”) ( $N = 43$ ), a spatial level between provinces and municipalities, corresponding to the Eurostat Nomenclature of Territorial Units for Statistics (NUTS) level 3. We identified urban areas using the classification of Belgian metropolitan areas by Luyten and Van Hecke (2007). Based on morphological and functional criteria (such as population density, land use, and commuter flows) they demarcated 18 urban agglomerations in Belgium [26]. If a district contains an urban agglomeration, we subdivided the district into an urban and a non-urban sub-district. As the district of Hasselt contains two urban agglomerations, a separate urban sub-district is constructed for each agglomeration. Large metropolitan areas (for example Antwerp and Liege) are further subdivided into two urban sub-districts, one containing the inner city, and one containing the surrounding agglomeration. Brussels is split into two urban sub-districts, one containing the “inner city” and the other the “outer city”. Districts that do not contain an urban agglomeration are not further subdivided and are classified as non-urban. There are three pairs of adjacent non-urban districts that have a relatively small number of inhabitants (Diksmuide and Veurne, Bastogne and Marche-en-Famenne, Arlon and Virton). These pairs are grouped together to ensure each spatial unit contains at least 50,000 inhabitants. In this way, a total of 68 regions are demarcated, of which 28 are classified as urban and 40 as non-urban (Fig 1). The number of lung cancer deaths and person years by sub-district varies from 18 deaths and 34,326 person years in women (Philippeville) to 1,064 deaths and 211,356 person years in men (central city of Antwerp).

**Measurement of individual characteristics.** There are several indicators for individual SES, including education, income, occupation, and housing status [27], although a combination of variables into one index can be used as well [28]. This study measures individual SES using information from the 2001 census on education, housing comfort and home ownership. Education captures knowledge and skills, income and housing comfort and home ownership

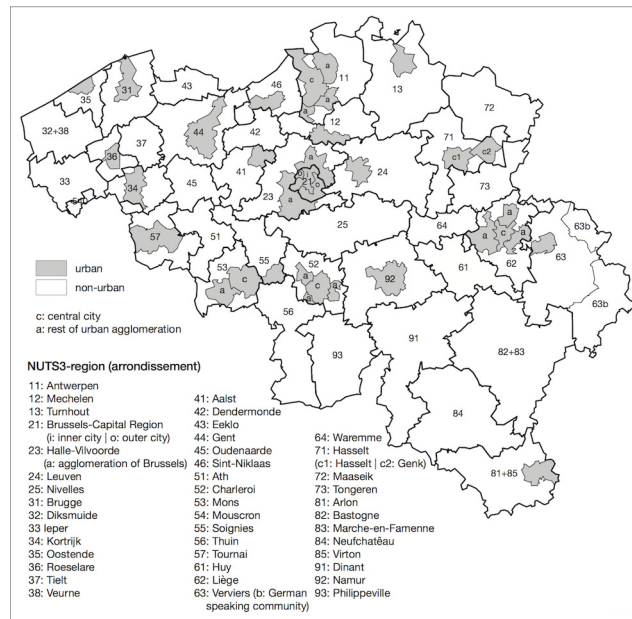

**Fig 1. Belgian sub-districts.** Cartography: Didier Willaert

doi:10.1371/journal.pone.0147099.g001

capture material resources [27]. Each indicator thus measures a different aspect of SES, capturing SES more aptly [28].

As the majority of individuals aged 65+ were retired, employment status was not included. Education is based on the highest level of education attained and is categorized into four groups based on the International Standard Classification of Education (ISCED): (1) primary education or less (ISCED 0–1); (2) lower secondary education (ISCED 2); (3) upper and post-secondary education (ISCED 3–4); and (4) tertiary education (ISCED 5–6). Housing comfort is a weighted indicator based on the number of large repairs needed, living space, number of bedrooms and amenities. Housing comfort is classified into five categories: low quality; basic quality; good quality; good quality and spacious; and high quality and spacious [29]. Home ownership is a dummy variable indicating whether an individual is tenant or owner. Being married is shown to have a protective influence on cancer risk [30]. Marital status (married/non-married) is therefore included as a control variable together with age in years in 2001.

In total 473,067 individuals (27.2%) have a missing value on one of the individual SES variables. Lung cancer mortality rates for individuals with missing data on educational attainment and/or home ownership are slightly higher and lower, respectively, compared to the reference group (results not shown), while individuals with missing information on comfort level did not show significantly different mortality rates. However, including persons with missing values did not substantially alter the model outcomes, and they were therefore excluded. As a result, the final study population consists of 1,269,289 individuals (543,407 men and 725,882 women).

**Measurement of sub-district level characteristics.** Urbanicity, unemployment rate, proportion miners and proportion other high-risk industries are included as variables at sub-district level. Urbanicity is indicated by a dummy variable (urban/non-urban). Sub-districts belonging to an urban agglomeration as defined by Luyten and Van Hecke (2007) are classified as urban. Sub-districts outside an urban agglomeration are classified as non-urban. The unemployment rate is included as a proxy of area deprivation, and is calculated by the number of

unemployed individuals as a percentage of the total labor force based on the 2001 census. The unemployment rate is expressed in quartiles; each quartile includes an approximately equal number of areas.

Environmental exposure to industrial pollution is estimated through the share of total industries that are considered high-risk industries per sub-district, measured by two variables: the percentage of the employed population employed in mining, and the percentage of the employed population employed in other high-risk industries. To incorporate the lag time between exposure and disease onset, both variables are based on the situation in 1981. The variables were constructed using a four-step procedure. First, the total population employed by industry is determined by sub-district. Second, manual workers in mining and in other high-risk industries are identified as working in either mining or high-risk industries respectively, whereas non-manual workers are not. Ahrens and Merletti [10] constructed a list of industries and occupations with a known risk of lung cancer, including mining; gas production; asbestos production; metal industries; ship, vehicle, and railroad manufacturing; construction workers and painters. Coal mining is the main mining industry in Belgium, however, coal is not confirmed as a carcinogenic by the IARC [31] nor is it included in the list by Ahrens and Merletti. Coal dust on the other hand, does contain several carcinogenic substances including zinc, arsenic and cadmium [32] and might expose local residents to environmental contamination through air or water [21]. Coal mining is therefore added to the mining types mentioned by Ahrens and Merletti (which include metal ore mining, and mining of certain non-metallic minerals). The remaining industries on their list are categorized as other high-risk industries. Third, the total number employed in mining, the total number employed in other high-risk industries and the total employed population are aggregated by sub-district. Fourth, the percentage employed in mining per district is calculated by dividing the total number of manual workers employed in mining by the employed population. The percentage employed in other high-risk industries per district is calculated by dividing the total number of manual workers in other high-risk industries by the employed population. Both variables are categorized in quartiles to aid interpretation.

## Methods

First, to get an overview of geographical patterns in lung cancer mortality in Belgium, the age-standardized mortality rate (ASMR), directly standardized to the 2001 Belgian population, was calculated by sub-district. The 95% confidence intervals for the ASMR were calculated based on a gamma distribution, which is more reliable when counts are small and variable [33]. Second, the association between lung cancer mortality and individual and sub-district characteristics, and their contribution to geographical mortality differences is estimated using multilevel Poisson models. As the hierarchical data structure and the non-independence of observations are aptly taken into account, multilevel models will result in more accurate estimates compared to single-level models [34]. Furthermore, multilevel models allow for the estimation of sub-district-level variation in lung cancer mortality and for the estimation of the extent to which individual and sub-district level characteristics can account for this variation [14]. A random intercept Poisson model is used including individuals at level 1 and sub-districts at level 2. The log of the person years is used as offset to account for differing exposure times. The model assumes that the effects of individual and sub-district level characteristics are similar across sub-districts, while lung cancer mortality at sub-district level (random intercept) is allowed to vary. The average relative deviation (ARD) for each model is obtained by post estimation [35], and is used to express the percentage deviation of the sub-district-variation from the total lung cancer mortality rate [19]. All analyses were conducted using Stata version 13.1 [36].

All models are conducted for men and women separately, and are restricted to people of 65 years and older. First, the null model is estimated. This model is adjusted for age only and serves as the baseline model. Additionally, three subsequent models were estimated, each controlled for age and marital status. Model 1 includes individual SES and is expanded stepwise by including urbanicity and unemployment rate (model 2), urbanicity and high-risk industry (percentage miners, and percentage other high-risk industries) (model 3). Model 4 includes all covariates (individual SES, urbanicity, unemployment rate and high-risk industry).

To test for the robustness of the findings, several supplementary analyses have been conducted. The models were repeated for the native Belgian population; for individuals residing in the same municipality in 1991 and 2001 (assuming a stable residence for over 10 years); and at municipal level. This did not substantially alter the results, nor when the models were repeated including missing values for individual SES, coded as a separate category. In addition, the models for men were repeated including individual occupation in 1981. This analysis could only be conducted for a subset of the male population (57%) who could be linked to the 1981 census and where information on occupation was available. Men employed as manual worker in other high-risk industries have a significantly higher lung cancer mortality risk. However, the inclusion of individual occupational exposure did not affect the outcomes for either individual SES or sub-district characteristics substantially. Finally, the models including the percentage employed in mining were repeated, further breaking down mining into coal mining and other mining types. Results of the supplementary analyses are available upon request.

## Results

### Regional variation in lung cancer mortality

The geographical patterns for lung cancer mortality in Belgium for men and women aged 65 + are visualized in [Fig 2](#). The maps show clear regional disparities in lung cancer mortality in Belgium, but also clear differences in the geographical pattern for men and women. Among men an east-west pattern is visible with high lung cancer mortality rates located in the east of Belgium, while among women high lung cancer mortality rates tend to be clustered in the cities. Brussels is an interesting case as the lung cancer mortality rate is among the lowest for men and among the highest for women. [Table 1](#) shows the random variation in lung cancer mortality at sub-district level. The null model shows significant sub-district-level variation for both men and women. Geographical differences in lung cancer mortality are largest among women; their average relative deviation (ARD = 22%) is higher compared to that of men (ARD = 8.8%).

### Association of individual SES with lung cancer mortality

Individual SES is negatively associated with lung cancer mortality, and individuals with a higher SES have a lower risk of lung cancer mortality ([Table 2](#) and [Table 3](#); model 1). Compared to low-educated men, highly educated men have a substantially lower lung cancer mortality risk (MRR = 0.55 [95%CI 0.53–0.58]). Highly educated women have a lower lung cancer mortality risk as well (MRR = 0.82 [95%CI 0.73–0.92]), however the lung cancer mortality among women with an upper- and post-secondary education does not differ from that of the low-educated women. Men living in good-quality housing experience lower levels of lung cancer mortality compared to men living in low-quality housing. Among women, housing comfort appears to have little association with lung cancer mortality. Ownership of a house on the other hand results in lower lung cancer mortality among women (MRR = 0.65 [95%CI 0.61–0.69]) compared to women who rent. A similar beneficial effect of home ownership on lung cancer mortality is observed for men (MRR = 0.76 [95%CI 0.74–0.79]). Marital status for men

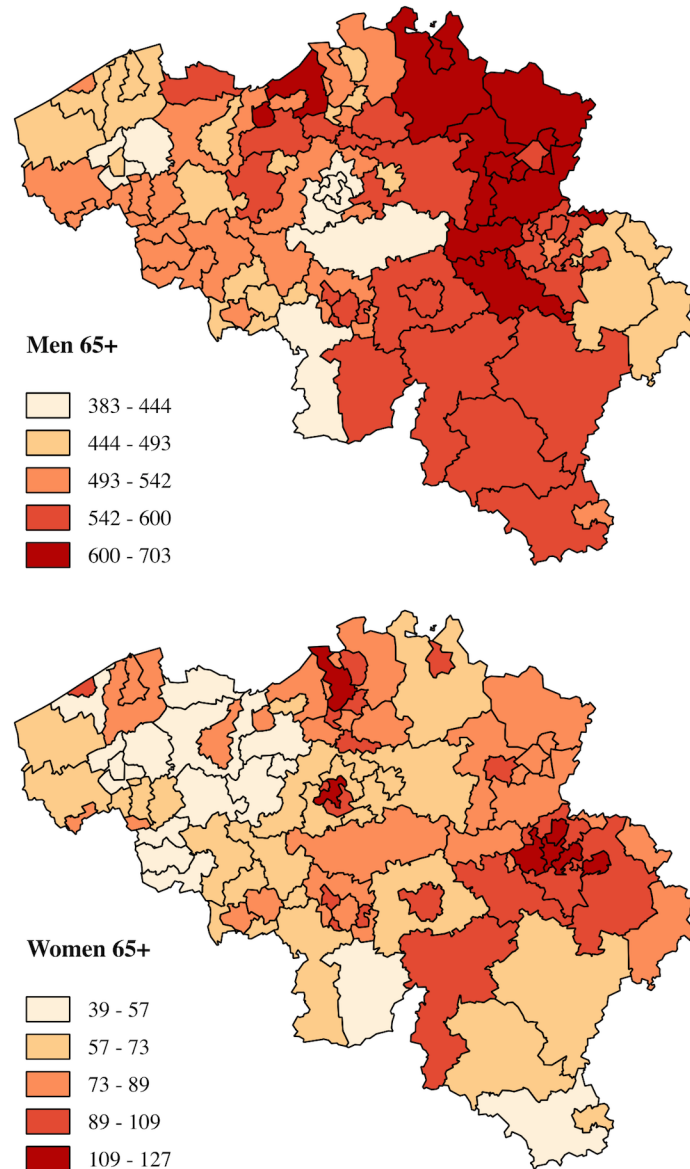

**Fig 2. Directly standardized\* lung cancer mortality rates for Belgium 2001–2011, men and women aged 65+.** \*Directly standardized to the 2001 Belgian population. Source: Belgian 2001 census linked to the National Register (2001–2011)

doi:10.1371/journal.pone.0147099.g002

is not significantly associated with lung cancer mortality, while for women being married results in a significantly lower lung cancer mortality risk (MRR = 0.78 [95%CI 0.73–0.83]).

Controlling for individual SES results in a 15.7% decrease of the sub-district-level variation compared to the null model among women (Table 1; model 1). Regional variation in individual SES thus accounts for a small part of the sub-district variation in female lung cancer mortality. Among men, the inclusion of individual SES results in a change of 6.9% in regional variation.

### Association of sub-district-level characteristics with lung cancer mortality

When the sub-district characteristics are included (model 4), the effects of individual SES remain unchanged, indicating that there is little confounding between the individual and

**Table 1. Random-intercept variance in lung cancer mortality between sub-districts by model.**

|                                   | Null model <sup>a</sup> | Model 1 <sup>b</sup> | Model 2 <sup>c</sup> | Model 3 <sup>d</sup> | Model 4 <sup>e</sup> |
|-----------------------------------|-------------------------|----------------------|----------------------|----------------------|----------------------|
| <i>Variance (standard error)</i>  |                         |                      |                      |                      |                      |
| Men 65+                           | 0.109 (0.012) *         | 0.109 (0.012) *      | 0.098 (0.012) *      | 0.081 (0.011) *      | 0.074 (0.010) *      |
| Women 65+                         | 0.248 (0.027) *         | 0.225 (0.026) *      | 0.149 (0.024) *      | 0.152 (0.023) *      | 0.130 (0.023) *      |
| <i>Average Relative Deviation</i> |                         |                      |                      |                      |                      |
| Men 65+                           | 8.8%                    | 8.2%                 | 7.6%                 | 5.8%                 | 5.2%                 |
| Women 65+                         | 22.0%                   | 18.5%                | 9.8%                 | 10.7%                | 8.2%                 |
| <i>% Change from null model</i>   |                         |                      |                      |                      |                      |
| Men 65+                           |                         | 6.9%                 | 14.3%                | 33.8%                | 41.0%                |
| Women 65+                         |                         | 15.7%                | 55.4%                | 51.2%                | 62.6%                |

\* P<0.05

<sup>a</sup>Null model: adjusted for age only

<sup>b</sup>Model 1: includes individual SES, adjusted for age and marital status

<sup>c</sup>Model 2: includes individual SES, urbanicity and unemployment rate, adjusted for age and marital status

<sup>d</sup>Model 3: includes individual SES, urbanicity and environmental pollution, adjusted for age and marital status

<sup>e</sup>Model 4: includes individual SES, urbanicity and unemployment rate and industrial pollution, adjusted for age and marital status

doi:10.1371/journal.pone.0147099.t001

sub-district level variables included in the model. In line with the spatial pattern observed in the map (Fig 2), lung cancer mortality among women in urban areas is substantially higher compared to non-urban areas (MRR = 1.30 [95%CI = 1.16–1.46]) (model 2). Among men there are few differences in lung cancer mortality by urbanicity.

Sub-districts with a higher unemployment rate appear to have increased levels of lung cancer mortality among both men and women, when controlled for individual SES and urbanicity (model 2). Especially residents living in sub-districts in the 3th quartile of unemployment experience higher lung cancer mortality risks (MRR<sub>men Q3</sub> = 1.13 [95% CI = 1.05–1.23]; MRR<sub>women Q3</sub> = 1.30 [95%CI = 1.13–1.49]). For the sub-district proportion working in high-risk industries (model 3), the association with lung cancer mortality depends on the type of industry. The percentage working in mining in the sub-district is associated with higher lung cancer mortality, especially among men. Female lung cancer mortality is higher among women living in sub-districts with the highest proportion of miners (MRR = 1.22 [95%CI = 1.06–1.41]). Other high-risk industries do not appear to be associated with increased lung cancer mortality. The addition of all sub-district characteristics in the full model (model 4) results in contrasting changes in the effects of unemployment rate for men and industry for women. Among women, lung cancer mortality in mining areas is no longer significantly elevated after unemployment rate is included (model 3 vs. 4). The effects of urbanicity, unemployment rate and other high-risk industries on female lung cancer mortality remain unchanged. For men, the effect of unemployment is largely attenuated by the inclusion of the industry variables and a reverse pattern can now be observed, with lower mortality rates among sub-districts with a high unemployment rate (model 2 vs. 4). The elevated levels of male lung cancer mortality observed for mining remain in all quartiles (model 3 vs. 4). Men living in sub-districts with the highest percentage of miners experience up to 30% higher lung cancer mortality (MRR = 1.30 [95%CI = 1.18–1.43]) compared to men in sub-districts with the lowest percentage of miners (model 4). When going more in-depth into the type of mining, a higher lung cancer mortality risk is mainly observed in sub-districts with a high percentage of mines other than coal mining (results not shown).



**Table 2. Age-adjusted lung cancer mortality rate ratios (MRR) with 95% confidence intervals (CI) by individual and sub-district characteristics 2001–2011, men aged 65+.**

|                                                 | Model 1 <sup>a</sup> |             | Model 2 <sup>b</sup> |             | Model 3 <sup>c</sup> |             | Model 4 <sup>d</sup> |             |
|-------------------------------------------------|----------------------|-------------|----------------------|-------------|----------------------|-------------|----------------------|-------------|
|                                                 | MRR                  | 95%CI       | MRR                  | 95%CI       | MRR                  | 95%CI       | MRR                  | 95%CI       |
| <b>Individual characteristics</b>               |                      |             |                      |             |                      |             |                      |             |
| <i>Educational level</i>                        |                      |             |                      |             |                      |             |                      |             |
| Pre-primary/primary (ref.)                      | 1.00                 | -           | 1.00                 | -           | 1.00                 | -           | 1.00                 | -           |
| Lower secondary                                 | 0.84                 | (0.81–0.87) | 0.84                 | (0.81–0.87) | 0.84                 | (0.81–0.87) | 0.84                 | (0.81–0.87) |
| Upper and post secondary                        | 0.72                 | (0.69–0.76) | 0.72                 | (0.69–0.76) | 0.72                 | (0.69–0.76) | 0.72                 | (0.69–0.76) |
| Tertiary                                        | 0.55                 | (0.53–0.58) | 0.55                 | (0.53–0.58) | 0.55                 | (0.53–0.58) | 0.55                 | (0.53–0.58) |
| <i>Comfort level</i>                            |                      |             |                      |             |                      |             |                      |             |
| Low quality (ref.)                              | 1.00                 | -           | 1.00                 | -           | 1.00                 | -           | 1.00                 | -           |
| Basic quality                                   | 1.02                 | (0.97–1.07) | 1.02                 | (0.97–1.07) | 1.02                 | (0.97–1.07) | 1.02                 | (0.97–1.07) |
| Good quality                                    | 0.90                 | (0.86–0.94) | 0.90                 | (0.86–0.94) | 0.90                 | (0.86–0.94) | 0.90                 | (0.86–0.94) |
| High quality                                    | 0.93                 | (0.89–0.98) | 0.93                 | (0.89–0.98) | 0.93                 | (0.89–0.98) | 0.93                 | (0.88–0.98) |
| Very high quality                               | 0.84                 | (0.79–0.89) | 0.84                 | (0.78–0.89) | 0.84                 | (0.79–0.89) | 0.83                 | (0.78–0.89) |
| <i>Home ownership</i>                           |                      |             |                      |             |                      |             |                      |             |
| Tenant (ref.)                                   | 1.00                 | -           | 1.00                 | -           | 1.00                 | -           | 1.00                 | -           |
| Owner                                           | 0.76                 | (0.74–0.79) | 0.76                 | (0.74–0.79) | 0.76                 | (0.74–0.79) | 0.76                 | (0.74–0.79) |
| <i>Marital status</i>                           |                      |             |                      |             |                      |             |                      |             |
| Non-married (ref.)                              | 1.00                 | -           | 1.00                 | -           | 1.00                 | -           | 1.00                 | -           |
| Married                                         | 0.99                 | (0.96–1.02) | 0.99                 | (0.96–1.02) | 0.99                 | (0.96–1.02) | 0.99                 | (0.96–1.02) |
| <b>Sub-district characteristics</b>             |                      |             |                      |             |                      |             |                      |             |
| <i>Urbanicity</i>                               |                      |             |                      |             |                      |             |                      |             |
| Non-urban (ref.)                                |                      |             | 1.00                 | -           | 1.00                 | -           | 1.00                 | -           |
| Urban                                           |                      |             | 0.97                 | (0.91–1.04) | 1.00                 | (0.95–1.06) | 1.03                 | (0.97–1.10) |
| <i>Unemployment rate</i>                        |                      |             |                      |             |                      |             |                      |             |
| Q1 (lowest) (ref.)                              |                      |             | 1.00                 | -           |                      |             | 1.00                 | -           |
| Q2                                              |                      |             | 1.10                 | (1.01–1.20) |                      |             | 1.01                 | (0.93–1.09) |
| Q3                                              |                      |             | 1.13                 | (1.05–1.23) |                      |             | 0.94                 | (0.85–1.03) |
| Q4 (highest)                                    |                      |             | 1.06                 | (0.97–1.16) |                      |             | 0.89                 | (0.81–0.99) |
| <i>% Employed in mining</i>                     |                      |             |                      |             |                      |             |                      |             |
| Q1 (lowest) (ref.)                              |                      |             |                      |             | 1.00                 | -           | 1.00                 | -           |
| Q2                                              |                      |             |                      |             | 1.09                 | (1.01–1.17) | 1.08                 | (1.01–1.15) |
| Q3                                              |                      |             |                      |             | 1.13                 | (1.05–1.21) | 1.19                 | (1.10–1.30) |
| Q4 (highest)                                    |                      |             |                      |             | 1.22                 | (1.13–1.31) | 1.30                 | (1.18–1.43) |
| <i>% Employed in other high-risk industries</i> |                      |             |                      |             |                      |             |                      |             |
| Q1 (lowest) (ref.)                              |                      |             |                      |             | 1.00                 | -           | 1.00                 | -           |
| Q2                                              |                      |             |                      |             | 0.94                 | (0.88–1.02) | 0.94                 | (0.87–1.00) |
| Q3                                              |                      |             |                      |             | 0.97                 | (0.90–1.04) | 0.97                 | (0.91–1.04) |
| Q4 (highest)                                    |                      |             |                      |             | 0.97                 | (0.90–1.04) | 0.96                 | (0.89–1.03) |

Ref. = Reference group

<sup>a</sup>Model 1: includes individual SES, adjusted for age and marital status

<sup>b</sup>Model 2: includes individual SES, urbanicity and unemployment rate, adjusted for age and marital status

<sup>c</sup>Model 3: includes individual SES, urbanicity and environmental pollution, adjusted for age and marital status

<sup>d</sup>Model 4: includes individual SES, urbanicity and unemployment rate and industrial pollution, adjusted for age and marital status

doi:10.1371/journal.pone.0147099.t002

**Table 3. Age-adjusted lung cancer mortality rate ratios (MRR) with 95% confidence intervals (CI) by individual and sub-district characteristics 2001–2011, women aged 65+.**

|                                                 | Model 1 <sup>a</sup> |             | Model 2 <sup>b</sup> |             | Model 3 <sup>c</sup> |             | Model 4 <sup>d</sup> |             |
|-------------------------------------------------|----------------------|-------------|----------------------|-------------|----------------------|-------------|----------------------|-------------|
|                                                 | MRR                  | 95%CI       | MRR                  | 95%CI       | MRR                  | 95%CI       | MRR                  | 95%CI       |
| <b>Individual characteristics</b>               |                      |             |                      |             |                      |             |                      |             |
| <i>Educational level</i>                        |                      |             |                      |             |                      |             |                      |             |
| Pre-primary/primary (ref.)                      | 1.00                 | -           | 1.00                 | -           | 1.00                 | -           | 1.00                 | -           |
| Lower secondary                                 | 0.93                 | (0.87–1.00) | 0.93                 | (0.87–1.00) | 0.93                 | (0.87–1.00) | 0.93                 | (0.87–0.99) |
| Upper and post secondary                        | 0.97                 | (0.89–1.06) | 0.97                 | (0.89–1.05) | 0.97                 | (0.89–1.05) | 0.96                 | (0.88–1.05) |
| Tertiary                                        | 0.82                 | (0.73–0.92) | 0.81                 | (0.72–0.91) | 0.81                 | (0.72–0.91) | 0.81                 | (0.72–0.91) |
| <i>Comfort level</i>                            |                      |             |                      |             |                      |             |                      |             |
| Low quality (ref.)                              | 1.00                 | -           | 1.00                 | -           | 1.00                 | -           | 1.00                 | -           |
| Basic quality                                   | 0.94                 | (0.85–1.03) | 0.94                 | (0.86–1.03) | 0.94                 | (0.85–1.03) | 0.94                 | (0.86–1.03) |
| Good quality                                    | 0.92                 | (0.83–1.01) | 0.92                 | (0.84–1.02) | 0.92                 | (0.83–1.01) | 0.92                 | (0.84–1.02) |
| High quality                                    | 1.00                 | (0.90–1.11) | 1.00                 | (0.90–1.11) | 1.00                 | (0.90–1.11) | 1.00                 | (0.90–1.11) |
| Very high quality                               | 0.94                 | (0.82–1.07) | 0.94                 | (0.83–1.07) | 0.94                 | (0.82–1.07) | 0.94                 | (0.83–1.07) |
| <i>Home ownership</i>                           |                      |             |                      |             |                      |             |                      |             |
| Tenant (ref.)                                   | 1.00                 | -           | 1.00                 | -           | 1.00                 | -           | 1.00                 | -           |
| Owner                                           | 0.65                 | (0.61–0.69) | 0.65                 | (0.61–0.69) | 0.65                 | (0.61–0.69) | 0.65                 | (0.61–0.69) |
| <i>Marital status</i>                           |                      |             |                      |             |                      |             |                      |             |
| Non-married (ref.)                              | 1.00                 | -           | 1.00                 | -           | 1.00                 | -           | 1.00                 | -           |
| Married                                         | 0.78                 | (0.73–0.83) | 0.78                 | (0.74–0.83) | 0.78                 | (0.73–0.83) | 0.78                 | (0.74–0.83) |
| <b>Sub-district characteristics</b>             |                      |             |                      |             |                      |             |                      |             |
| <i>Urbanicity</i>                               |                      |             |                      |             |                      |             |                      |             |
| Non-urban (ref.)                                |                      |             | 1.00                 | -           | 1.00                 | -           | 1.00                 | -           |
| Urban                                           |                      |             | 1.30                 | (1.16–1.46) | 1.33                 | (1.20–1.48) | 1.30                 | (1.15–1.47) |
| <i>Unemployment rate</i>                        |                      |             |                      |             |                      |             |                      |             |
| Q1 (lowest) (ref.)                              |                      |             | 1.00                 | -           |                      |             | 1.00                 | -           |
| Q2                                              |                      |             | 1.04                 | (0.90–1.21) |                      |             | 1.03                 | (0.88–1.20) |
| Q3                                              |                      |             | 1.30                 | (1.13–1.49) |                      |             | 1.29                 | (1.08–1.54) |
| Q4 (highest)                                    |                      |             | 1.16                 | (0.99–1.34) |                      |             | 1.14                 | (0.94–1.39) |
| <i>% Employed in mining</i>                     |                      |             |                      |             |                      |             |                      |             |
| Q1 (lowest) (ref.)                              |                      |             |                      |             | 1.00                 | -           | 1.00                 | -           |
| Q2                                              |                      |             |                      |             | 1.07                 | (0.93–1.23) | 1.06                 | (0.93–1.21) |
| Q3                                              |                      |             |                      |             | 1.09                 | (0.95–1.26) | 1.00                 | (0.85–1.17) |
| Q4 (highest)                                    |                      |             |                      |             | 1.22                 | (1.06–1.41) | 1.03                 | (0.86–1.23) |
| <i>% Employed in other high-risk industries</i> |                      |             |                      |             |                      |             |                      |             |
| Q1 (lowest) (ref.)                              |                      |             |                      |             | 1.00                 | -           | 1.00                 | -           |
| Q2                                              |                      |             |                      |             | 0.84                 | (0.72–0.97) | 0.87                 | (0.76–1.00) |
| Q3                                              |                      |             |                      |             | 0.96                 | (0.83–1.11) | 0.98                 | (0.86–1.12) |
| Q4 (highest)                                    |                      |             |                      |             | 0.99                 | (0.86–1.13) | 1.05                 | (0.92–1.20) |

Ref. = Reference group

<sup>a</sup>Model 1: includes individual SES, adjusted for age and marital status

<sup>b</sup>Model 2: includes individual SES, urbanicity and unemployment rate, adjusted for age and marital status

<sup>c</sup>Model 3: includes individual SES, urbanicity and environmental pollution, adjusted for age and marital status

<sup>d</sup>Model 4: includes individual SES, urbanicity and unemployment rate and industrial pollution, adjusted for age and marital status

doi:10.1371/journal.pone.0147099.t003

The sub-district variation in lung cancer mortality decreases substantially after including the sub-district characteristics in the model (Table 1, model 2 and 3). After including all sub-district characteristics in addition to individual SES (model 4), the ARD is reduced by 41% among men and 63% among women compared to the regional variation observed in the null model. Sub-district characteristics thus explain part of the geographical variation in lung cancer mortality in both men and women.

## Discussion

The aim of this study was to map out sub-district-level variation in lung cancer mortality in Belgium, and to examine to what extent individual and area SES and industrial pollution contribute to the observed geographical patterns. This is one of the first studies on lung cancer mortality investigating the combined effect of individual and area level SES and industrial exposure. The results show clear regional disparities in lung cancer mortality in Belgium but also disparities in the geographical pattern for men and women aged 65+. While lung cancer mortality among men is mainly elevated in the east of Belgium, women experience higher lung cancer mortality rates in urban areas.

In line with previous studies [7,8], an association between individual SES and lung cancer mortality is found. Individuals who are highly educated, living in owner-occupied and high-quality housing have a lower risk of lung cancer mortality. However, individual characteristics do not appear to be a major contributor to regional lung cancer mortality differences. Sub-district characteristics have a modest effect on lung cancer mortality. This finding is consistent with previous research results showing an association between area-characteristics on lung cancer mortality, independently of individual SES; the most deprived areas having a higher lung cancer mortality compared to the least deprived [14,16–18]. Controlling for smoking, occupational and environmental exposure in these studies could not fully explain elevated lung cancer mortality risks in deprived areas [17]. Area deprivation might impact health and mortality through social norms on health behavior, lack of social organization and support, limited access to healthcare and other services, or through an unhealthy physical environment [12,37]. Not all studies did find an effect of area deprivation however [15]. Studies including the proportion of manual workers, social cohesion [19] and median income [38] for instance did not report a significant association with lung cancer mortality.

The outcomes of this study, on the other hand, show that area characteristics should not be overlooked, even though they seem to be less associated with lung cancer mortality, compared to individual-level characteristics. Area deprivation, measured by the sub-district-level unemployment rate, is associated with increased lung cancer mortality. After controlling for industrial exposure, this association is largely attenuated for men but not for women, suggesting a larger impact of area deprivation for women. Stafford et al. (2005) also found a stronger impact of neighborhood characteristics on women's health, possibly because women tend to spend more time in the neighborhood they live in or simply because they are more vulnerable to neighborhood characteristics [39].

Urbanicity appears to be another determinant of female lung cancer mortality. Women in urban areas have a 30% higher risk of dying from lung cancer than women living in non-urban areas, even when controlling for individual SES, area deprivation and industrial exposure. Among men, differences between urban and non-urban sub-districts were not observed. Elevated lung cancer risks in urban areas were observed in other European studies as well, albeit for both sexes [40,41]. Area deprivation could explain only part of the urban excess in lung cancer mortality in these studies [41]. A higher smoking prevalence among women in urban

areas has been observed in several Western-European countries [42]. Smoking behavior thus might explain the observed association between urbanicity and female lung cancer mortality.

While the unemployment rate and urbanicity showed little associations to male lung cancer mortality, industry does appear to have an association. Men living in sub-districts with mining industry have higher lung cancer mortality, with up to 30% increased risks in the sub-districts with the highest proportion of miners. Especially mining types other than coal mining seem to cause this effect. A possible explanation might be environmental pollution, as mining dust and aerosol particles include several carcinogenic substances [32], and elevated metal concentrations were found near mining operations [43]. However, the results do not indicate substantial increased lung cancer mortality among women living in the same sub-districts. Possibly men living in mining sub-districts have a higher risk of occupational exposure by being employed in these types of mining. A study on lung cancer incidence among miners found a higher lung cancer risk among men employed in mining, especially ore miners and quarrymen. The association remained significant after controlling for smoking and occupational exposure from working in other at-risk occupations [44]. To incorporate possible occupational exposure, the analysis was repeated for a subset of the male study population including individual occupation in high-risk industries in 1981. The inclusion of individual occupation slightly reduces the mortality rates in areas with a high percentage employed in mining, yet mining areas continue to show elevated levels of male lung cancer mortality (results not shown). Unmeasured individual occupational exposure before 1981, other unmeasured area characteristics, or actual environmental pollution might underlie this elevated risk.

## Strengths and limitations

One of the strengths of this study is the use of a unique dataset covering the total Belgian population with mortality information from 2001 to 2011, including all lung cancer deaths during this period. The data include extensive information on socioeconomic and demographic variables, which makes it possible to measure several aspects of individual SES including education, housing comfort and home ownership. Each of these variables measures a different aspect of SES which is necessary to capture the complete picture of socioeconomic status [28]. As multiple indicators are used to measure individual SES, the risk that the observed effects of sub-district-level characteristics are due to unmeasured individual characteristics is reduced [13,34]. When data on individual SES are unavailable, studies often rely on aggregated area-level data to make assumptions on individuals, risking the so-called ecological fallacy [45]. By including both individual and area-level measures, this has been avoided in this study. This study also looked into the combined effect of area deprivation and industrial pollution, and as the results show, it might be important to incorporate both factors, as the sub-district's unemployment level and the percentage employed in mining and in other high-risk industries mitigate each other's effect.

The use of multilevel analysis enables us to study the variation in lung cancer mortality, and the effects of SES and industrial exposure, both between individuals and between sub-districts. Additionally, it takes into account the hierarchical structure of the data in which individuals are nested within sub-districts, producing more reliable outcomes [34]. A random intercept model is used, allowing lung cancer mortality to vary at sub-district level. It is unlikely that the associations between individual and sub-district level characteristics differ across sub-districts, which is why a random slope model (allowing these factors to vary across sub-districts) was not used.

Inherent to multilevel studies into the effects of area-characteristics on health and mortality, there are certain methodological considerations, including the geographical unit to be used, the

choice of area-level variables and the possibility of confounding factors [34,45]. The optimum geographical level to study area-effects on health and mortality is much debated [46,47]. Although area characteristics of both local neighborhoods and larger geographical units appear to affect mortality, the largest effects are generally observed for small-scale areas [13]. By using sub-district level, we ensured that the different regions contain enough cases to maintain stable results, and are detailed enough to distinguish between urban and non-urban areas. Analysis at smaller geographical levels would likely produce more unstable and unreliable results due to the small number of lung cancer deaths by area. To test the robustness of the area effects at sub-district level, the models were repeated at municipal level. This did not produce substantially different outcomes, except for a stronger effect of unemployment rate, especially in women (results not shown). Duration of residence in an area and selective migration might influence the effect of area-characteristics as well [12]. This is unlikely to bias our results as more than 90% of the study population had a stable residence for over 10 years (based on their municipality of residence in 1991 and 2001). The models produced similar outcomes when including the individuals with a long-term residence only (results not shown).

The sub-district level unemployment rate and the percentage employed in mining and in other high-risk industries are constructed from aggregated individual census data. They are therefore so-called derived variables, in contrary to integral variables, which are area characteristics without an equivalent at individual level that can be measured only at area-level [45]. However, the total population is used to calculate the sub-district's unemployment rate and employment in mining and other high-risk industries, minimizing overlap between individual and area-level variables within the study population. Although the full model including individual and sub-district-level SES and high-risk industry explains a large part of regional variation in lung cancer mortality (63% for women and 41% for men), significant regional variation remains. This suggests an impact of unmeasured factors.

A possible underlying determinant of the geographical pattern in lung cancer mortality is smoking behavior. Smoking is an important risk factor for lung cancer mortality, as 90% of lung cancer deaths in European men and 60% of lung cancer deaths in European women are expected to be tobacco-related [48]. Belgium not only has one of the highest male lung cancer mortality rates in Europe, but also used to have one of the highest per capita consumption of tobacco [49]. In the 1950s, an estimated 77% of Belgian men were smoking, this decreased to 53% in 1980 and further declined to 34% in 2001 [50]. The share of smokers among Belgian women remained stable over time: 20% in 1955, 21% in 1980, and 24% in 2001 [50]. These smoking trends result in strong cohort effects in lung cancer mortality rates among Belgian men [48]. The Belgian census does not include information on lifestyle, so it was not possible to control for smoking. Data from the Belgian Health Interview Survey (HIS) can give some insight into smoking behavior, although this survey is not as extensive as the population-based data used in this study and can only be disaggregated to the less-detailed provincial level (NUTS2). Results from the HIS from 2001 show no differences in the share of ever smokers by educational level. However, current smoking is less common among higher educated individuals (22%), compared to lower educated persons (30%). Heavy smoking is also less common among high educated individuals, although they do have a higher share of occasional smokers [51]. The higher smoking prevalence and higher share of heavy smokers among low educated individuals might contribute to the higher lung cancer mortality risk we observe in this group. On the other hand, the results of a Dutch study show that neither smoking nor occupational exposure could account for higher lung cancer incidence rates among low-educated individuals [8,52]. Compared to men with primary education only, the MRR of high educated men changed from 0.50 (95% CI 0.35–0.75) to 0.52 (95% CI 0.39–0.82) after controlling for smoking behavior and intake of  $\beta$ -carotene, vitamin C and retinol [8]. Additionally adjusting for

occupational exposure to carcinogens resulted in a MRR of 0.53 (95% CI 0.34–0.82) for high educated men [52].

Smoking might influence the geographic pattern in lung cancer mortality as well. Regional differences in smoking have been found to contribute to regional variation in all-cause mortality [53] and lung cancer specific mortality [54] in the Netherlands. Also in Belgium, the geographical pattern for lung cancer incidence and tobacco prevalence (measured by the incidence of COPD) appear to overlap [6]. Data from the HIS from 2001, 2004 and 2008 were used to get an indication of the geographical pattern of smoking for survey participants aged 65+. Smoking behavior among men aged 65+ did not significantly differ across provinces, with the exception of ever smokers. Especially Limburg, a province in the northeast, showed a high proportion of ever smokers, which might contribute to higher male lung cancer mortality in this region. Differences in smoking behavior could be an explanation for the significantly higher lung cancer mortality among women living in urban areas, which persisted even after controlling for individual SES and other area characteristics. The Health Interview Surveys (HIS) do not show differences in the proportion ever, current or daily smoking rates among women in urban areas, compared to sub-urban or rural areas. However, these figures are only available for women of all ages, and smoking rates by urbanization level could not be compared for women aged 65+ [55]. Among provinces, significant variations in smoking behavior among women aged 65+ can be observed. Provinces containing sub-districts with high female lung cancer mortality rates have a particularly high share of smokers. However, there are also some exceptions: provinces with a high smoking prevalence but without elevated lung cancer mortality or with a relatively low smoking prevalence but substantially higher levels of lung cancer mortality. Smoking has also been identified as an intermediary variable in the association between area characteristics and lung cancer mortality [17]. Previous studies found an increased smoking prevalence in deprived areas, which could only partly be explained by the individual characteristics of the residents [56]. Other risk factors, such as radon exposure, might contribute to geographical differences in lung cancer mortality as well. According to the Federal Agency of Nuclear Control relatively high radon concentrations are observed in the south of Belgium, with the highest concentrations in the southeast [57]. Radon could partially contribute to lung cancer mortality in these areas with high radon concentrations. However, sub-districts with the highest levels of lung cancer mortality show little overlap with areas with high radon concentrations. Other environmental risk-factors such as air pollution might have a possible influence on regional variation in lung cancer mortality as well [25].

Future studies should consider including additional variables to gain a better understanding of the effects of area characteristics on regional variation in lung cancer mortality. Controlling for smoking and long-term occupational exposure at the individual level is likely to result in more precise estimates of the association between sub-district characteristics and lung cancer mortality. In addition, more precise measurements of industrial pollution might result in stronger associations with lung cancer mortality. Data on concentrations of pollutants in the soil and air (from both industry and other sources such as traffic) might allow for a better insight into the association between lung cancer mortality and pollution at the sub-district level and are thus highly relevant for future study.

Yet, this study contributes to the limited knowledge on the association between lung cancer mortality and both individual and area-level characteristics simultaneously. The results indicate that there are substantial differences in lung cancer mortality by individual SES. Targeted anti-smoking measures specifically addressing low-SES individuals could ensure further declines in lung cancer among Belgian men and prevent a further increase among women in the future. Our study also gave insight into geographic patterns in lung cancer mortality, and pointed to areas with significantly higher levels of lung cancer mortality. Studies into regional

mortality differences are mentioned as helpful tools in discovering lung cancer causes other than tobacco consumption [54]. The results of our study point to a possible association between high-risk industries, especially mining, and elevated lung cancer risks.

## Conclusion

This study found a strong association between individual SES and lung cancer mortality. Individuals with a low SES experience significantly higher levels of lung cancer mortality. Sub-district level characteristics appear to have an influence on lung cancer mortality as well: in women an association between unemployment rate and lung cancer mortality was observed; in men an association between the percentage employed in mining and lung cancer mortality was observed. In addition to variation in lung cancer mortality between individuals, significant regional variation in lung cancer mortality between sub-districts in Belgium was found. Individual SES could only partly explain this regional variation. The bulk of lung cancer mortality's sub-district variation could be explained by sub-districts unemployment rate, the percentage employed in mining and the percentage employed in other high-risk industries, suggesting that both individual- and area-level characteristics are important contributors to regional differences in lung cancer mortality.

## Acknowledgments

We would like to express our gratitude to the Flemish Agency for Care and Health for their initial data preparation; to Statistics Belgium for supplying the mortality data; to Patrick Lusyne (Statistics Belgium) for performing the linkage procedure; to Didier Willaert (Interface Demography, Vrije Universiteit Brussel) for his indispensable data support; and to Hannelore De Grande (Interface Demography, Vrije Universiteit Brussel) for her support and help with the data application.

## Author Contributions

Conceived and designed the experiments: PH HV KV SG. Performed the experiments: PH. Analyzed the data: PH. Contributed reagents/materials/analysis tools: DW. Wrote the paper: PH. Critically revised the manuscript: HV DW KV SG.

## References

1. Youlten DR, Cramb SM, Baade PD. The International Epidemiology of Lung Cancer: geographical distribution and secular trends. *J Thorac Oncol*. 2008; 3: 819–831. doi: [10.1097/JTO.0b013e31818020eb](https://doi.org/10.1097/JTO.0b013e31818020eb) PMID: [18670299](https://pubmed.ncbi.nlm.nih.gov/18670299/)
2. Bray FI, Weiderpass E. Lung cancer mortality trends in 36 European countries: Secular trends and birth cohort patterns by sex and region 1970–2007. *Int J Cancer*. 2010; 126: 1454–1466. doi: [10.1002/ijc.24855](https://doi.org/10.1002/ijc.24855) PMID: [19728330](https://pubmed.ncbi.nlm.nih.gov/19728330/)
3. Malvezzi M, Bosetti C, Rosso T, Bertuccio P, Chatenoud L, Levi F, et al. Lung cancer mortality in European men: Trends and predictions. *Lung Cancer*. 2013; 80: 138–145. doi: [10.1016/j.lungcan.2013.01.020](https://doi.org/10.1016/j.lungcan.2013.01.020) PMID: [23434350](https://pubmed.ncbi.nlm.nih.gov/23434350/)
4. Nawrot TS, Torfs R, Fierens F, De Henauw S, Hoet PH, Van Kersschaever G, et al. Stronger associations between daily mortality and fine particulate air pollution in summer than in winter: evidence from a heavily polluted region in western Europe. *J Epidemiol Community Health*. 2007; 61: 146–149. doi: [10.1136/jech.2005.044263](https://doi.org/10.1136/jech.2005.044263) PMID: [17234874](https://pubmed.ncbi.nlm.nih.gov/17234874/)
5. OECD. OECD Environmental Performance Reviews: Belgium 2007. Paris: OECD Publishing; 2007. doi: [10.1787/9789264031128-en](https://doi.org/10.1787/9789264031128-en)
6. Henau K, Van Eycken E, Silversmit G, Pukkala E. Regional variation in incidence for smoking and alcohol related cancers in Belgium. *Cancer Epidemiol*. 2015; 39: 55–65. doi: [10.1016/j.canep.2014.10.009](https://doi.org/10.1016/j.canep.2014.10.009) PMID: [25466934](https://pubmed.ncbi.nlm.nih.gov/25466934/)

7. Van der Heyden JHA, Schaap MM, Kunst AE, Esnaola S, Borrell C, Cox B, et al. Socioeconomic inequalities in lung cancer mortality in 16 European populations. *Lung cancer*. 2009; 63: 322–330. doi: [10.1016/j.lungcan.2008.06.006](https://doi.org/10.1016/j.lungcan.2008.06.006) PMID: [18656277](https://pubmed.ncbi.nlm.nih.gov/18656277/)
8. Van Loon AJ, Goldbohm RA, van den Brandt PA. Lung cancer: is there an association with socioeconomic status in The Netherlands? *J Epidemiol Community Heal*. 1995; 49: 65–69. doi: [10.1136/jech.49.1.65](https://doi.org/10.1136/jech.49.1.65)
9. Brown T, Darnton A, Fortunato L, Rushton L. Occupational cancer in Britain. Respiratory cancer sites: larynx, lung and mesothelioma. *Br J Cancer*. 2012; 107: S56–S70. doi: [10.1038/bjc.2012.119](https://doi.org/10.1038/bjc.2012.119) PMID: [22710680](https://pubmed.ncbi.nlm.nih.gov/22710680/)
10. Ahrens W, Merletti F. A standard tool for the analysis of occupational lung cancer in epidemiologic studies. *Int J Occup Environ Health*. 1998; 4: 236–240. doi: [10.1179/oeh.1998.4.4.236](https://doi.org/10.1179/oeh.1998.4.4.236) PMID: [9876632](https://pubmed.ncbi.nlm.nih.gov/9876632/)
11. Duncan C, Jones K, Moon G. Context, composition and heterogeneity: using multilevel models in health research. *Soc Sci Med*. 1998; 46: 97–117. doi: [10.1016/s0277-9536\(97\)00148-2](https://doi.org/10.1016/s0277-9536(97)00148-2) PMID: [9464672](https://pubmed.ncbi.nlm.nih.gov/9464672/)
12. Robert SA. Socioeconomic Position and Health: The Independent Contribution of Community Socio-economic Context. *Annu Rev Sociol*. 1999; 25: 489–516.
13. Meijer M, Röhl J, Bloomfield K, Grittner U. Do neighborhoods affect individual mortality? A systematic review and meta-analysis of multilevel studies. *Soc Sci Med*. 2012; 74: 1204–1212. doi: [10.1016/j.socscimed.2011.11.034](https://doi.org/10.1016/j.socscimed.2011.11.034) PMID: [22365939](https://pubmed.ncbi.nlm.nih.gov/22365939/)
14. Bentley R, Kavanagh AM, Subramanian S V, Turrell G. Area disadvantage, individual socio-economic position, and premature cancer mortality in Australia 1998 to 2000: A multilevel analysis. *Cancer Causes Control*. 2008; 19: 183–193. doi: [10.1007/s10552-007-9084-7](https://doi.org/10.1007/s10552-007-9084-7) PMID: [18027094](https://pubmed.ncbi.nlm.nih.gov/18027094/)
15. Steenland K, Henley J, Calle E, Thun M. Individual- and area-level socioeconomic status variables as predictors of mortality in a cohort of 179,383 persons. *Am J Epidemiol*. 2004; 159: 1047–1056. doi: [10.1093/aje/kwh129](https://doi.org/10.1093/aje/kwh129) PMID: [15155289](https://pubmed.ncbi.nlm.nih.gov/15155289/)
16. Hastert TA, Beresford SAA, Sheppard L, White E. Disparities in cancer incidence and mortality by area-level socioeconomic status: a multilevel analysis. *J Epidemiol Community Heal*. 2014; 69: 168–176. doi: [10.1136/jech-2014-204417](https://doi.org/10.1136/jech-2014-204417)
17. Hystad P, Carpiano RM, Demers PA, Johnson KC, Brauer M. Neighbourhood socioeconomic status and individual lung cancer risk: Evaluating long-term exposure measures and mediating mechanisms. *Soc Sci Med*. 2013; 97: 95–103. doi: [10.1016/j.socscimed.2013.08.005](https://doi.org/10.1016/j.socscimed.2013.08.005) PMID: [24161094](https://pubmed.ncbi.nlm.nih.gov/24161094/)
18. Sharpe KH, McMahon AD, Raab GM, Brewster DH, Conway DI. Association between socioeconomic factors and cancer risk: A population cohort study in Scotland (1991–2006). *PLoS One*. 2014; 9: e89513. doi: [10.1371/journal.pone.0089513](https://doi.org/10.1371/journal.pone.0089513) PMID: [24586838](https://pubmed.ncbi.nlm.nih.gov/24586838/)
19. Martikainen P, Kauppinen TM, Valkonen T. Effects of the characteristics of neighbourhoods and the characteristics of people on cause specific mortality: a register based follow up study of 252,000 men. *J Epidemiol Community Health*. 2003; 57: 210–217. doi: [10.1136/jech.57.3.210](https://doi.org/10.1136/jech.57.3.210) PMID: [12594198](https://pubmed.ncbi.nlm.nih.gov/12594198/)
20. López-Cima MF, García-Pérez J, Pérez-Gómez B, Aragónés N, López-Abente G, Pascual T, et al. Lung cancer risk associated with residential proximity to industrial installations: A spatial analysis. *Int J Environ Sci Technol*. 2013; 10: 891–902. doi: [10.1007/s13762-013-0248-6](https://doi.org/10.1007/s13762-013-0248-6)
21. Hendryx M, O'Donnell K, Horn K. Lung cancer mortality is elevated in coal-mining areas of Appalachia. *Lung Cancer*. 2008; 62: 1–7. doi: [10.1016/j.lungcan.2008.02.004](https://doi.org/10.1016/j.lungcan.2008.02.004) PMID: [18353487](https://pubmed.ncbi.nlm.nih.gov/18353487/)
22. Fano V, Michelozzi P, Ancona C, Capon A, Forastiere F, Perucci C a. Occupational and environmental exposures and lung cancer in an industrialised area in Italy. *Occup Environ Med*. 2004; 61: 757–763. doi: [10.1136/oem.2003.010728](https://doi.org/10.1136/oem.2003.010728) PMID: [15317916](https://pubmed.ncbi.nlm.nih.gov/15317916/)
23. Vigotti MA, Mataloni F, Bruni A, Minniti C, Gianicolo EA. Mortality analysis by neighbourhood in a city with high levels of industrial air pollution. *Int J Public Health*. 2014; 59: 645–653. doi: [10.1007/s00038-014-0554-x](https://doi.org/10.1007/s00038-014-0554-x) PMID: [24760197](https://pubmed.ncbi.nlm.nih.gov/24760197/)
24. Nawrot T, Plusquin M, Hogervorst J, Roels HA, Celis H, Thijs L, et al. Environmental exposure to cadmium and risk of cancer: A prospective population-based study. *Lancet Oncol*. 2006; 7: 119–126. doi: [10.1016/S1470-2045\(06\)70545-9](https://doi.org/10.1016/S1470-2045(06)70545-9) PMID: [16455475](https://pubmed.ncbi.nlm.nih.gov/16455475/)
25. Boffetta P. Human cancer from environmental pollutants: the epidemiological evidence. *Mutat Res*. 2006; 608: 157–162. doi: [10.1016/j.mrgentox.2006.02.015](https://doi.org/10.1016/j.mrgentox.2006.02.015) PMID: [16843042](https://pubmed.ncbi.nlm.nih.gov/16843042/)
26. Luyten S, Van Hecke E. De Belgische stadsgewesten 2001. Brussel; 2007. Report No.: 84.
27. Galobardes B, Shaw M, Lawlor DA, Lynch JW, Davey Smith G. Indicators of socioeconomic position (part 1). *J Epidemiol Community Health*. 2006; 60: 7–12. doi: [10.1136/jech.2004.023531](https://doi.org/10.1136/jech.2004.023531)
28. Galobardes B, Shaw M, Lawlor DA, Lynch JW, Davey Smith G. Indicators of socioeconomic position (part 2). *J Epidemiol Community Health*. 2006; 60: 95–101. doi: [10.1136/jech.2004.028092](https://doi.org/10.1136/jech.2004.028092) PMID: [16415256](https://pubmed.ncbi.nlm.nih.gov/16415256/)



29. Deboosere P, Willaert D. Codeboek algemene socio-economische enquête 2001. Brussels; 2004.
30. Aizer AA, Chen M-H, McCarthy EP, Mendu ML, Koo S, Wilhite TJ, et al. Marital status and survival in patients with cancer. *J Clin Oncol*. 2013; 31: 3869–76. doi: [10.1200/JCO.2013.49.6489](https://doi.org/10.1200/JCO.2013.49.6489) PMID: [24062405](https://pubmed.ncbi.nlm.nih.gov/24062405/)
31. International Agency for Research on Cancer. IARC Monographs on the Evaluation of Carcinogenic Risks to Humans: Silica, Some Silicates, Coal Dust and Para- Aramid Fibrils, Vol. 68. Iarc Monographs On The Evaluation Of Carcinogenic Risks To Humans. Lyon; 1997.
32. Csavina J, Field J, Taylor MP, Gao S, Landázuri A, Betterton EA, et al. A review on the importance of metals and metalloids in atmospheric dust and aerosol from mining operations. *Sci Total Environ*. 2012; 433: 58–73. doi: [10.1016/j.scitotenv.2012.06.013](https://doi.org/10.1016/j.scitotenv.2012.06.013) PMID: [22766428](https://pubmed.ncbi.nlm.nih.gov/22766428/)
33. Fay MP, Feuer EJ. Confidence Intervals for Directly Standardized Rates: a method based on the gamma distribution. *Stat Med*. 1997; 16: 791–801. doi: [10.1002/\(SICI\)1097-0258\(19970415\)16:7<791::AID-SIM500>3.0.CO;2-#](https://doi.org/10.1002/(SICI)1097-0258(19970415)16:7<791::AID-SIM500>3.0.CO;2-#) PMID: [9131766](https://pubmed.ncbi.nlm.nih.gov/9131766/)
34. Pickett KE, Pearl M. Multilevel analyses of neighbourhood socioeconomic context and health outcomes: a critical review. *J Epidemiol Community Health*. 2001; 55: 111–122. doi: [10.1136/jech.55.2.111](https://doi.org/10.1136/jech.55.2.111) PMID: [11154250](https://pubmed.ncbi.nlm.nih.gov/11154250/)
35. Rabe-Hesketh S, Skrondal A. Multilevel and Longitudinal Modeling Using Stata. Second edition. College Station: Stata Press; 2008.
36. StataCorp. Stata Statistical Software: Release 13. College Station: StataCorp LP; 2013.
37. Diez Roux A V, Mair C. Neighborhoods and health. *Ann N Y Acad Sci*. 2010; 1186: 125–145. doi: [10.1111/j.1749-6632.2009.05333.x](https://doi.org/10.1111/j.1749-6632.2009.05333.x) PMID: [20201871](https://pubmed.ncbi.nlm.nih.gov/20201871/)
38. Chaix B, Rosvall M, Lynch J, Merlo J. Disentangling contextual effects on cause-specific mortality in a longitudinal 23-year follow-up study: Impact of population density or socioeconomic environment? *Int J Epidemiol*. 2006; 35: 633–643. doi: [10.1093/ije/dyl009](https://doi.org/10.1093/ije/dyl009) PMID: [16452106](https://pubmed.ncbi.nlm.nih.gov/16452106/)
39. Stafford M, Cummins S, Macintyre S, Ellaway A, Marmot M. Gender differences in the associations between health and neighbourhood environment. *Soc Sci Med*. 2005; 60: 1681–1692. doi: [10.1016/j.socscimed.2004.08.028](https://doi.org/10.1016/j.socscimed.2004.08.028) PMID: [15686801](https://pubmed.ncbi.nlm.nih.gov/15686801/)
40. Sharp L, Donnelly D, Hegarty A, Carsin A-E, Deady S, McCluskey N, et al. Risk of Several Cancers is Higher in Urban Areas after Adjusting for Socioeconomic Status. Results from a Two-Country Population-Based Study of 18 Common Cancers. *J Urban Heal*. 2014; 91: 510–525. doi: [10.1007/s11524-013-9846-3](https://doi.org/10.1007/s11524-013-9846-3)
41. Gartner A, Farewell D, Roach P, Dunstan F. Rural/urban mortality differences in England and Wales and the effect of deprivation adjustment. *Soc Sci Med*. 2011; 72: 1685–1694. doi: [10.1016/j.socscimed.2011.03.017](https://doi.org/10.1016/j.socscimed.2011.03.017) PMID: [21524504](https://pubmed.ncbi.nlm.nih.gov/21524504/)
42. Idris BI, Giskes K, Borrell C, Benach J, Costa G, Federico B, et al. Higher smoking prevalence in urban compared to non-urban areas: Time trends in six European countries. *Health Place*. 2007; 13: 702–712. doi: [10.1016/j.healthplace.2006.11.001](https://doi.org/10.1016/j.healthplace.2006.11.001) PMID: [17182269](https://pubmed.ncbi.nlm.nih.gov/17182269/)
43. Taylor MP, Mould SA, Kristensen LJ, Rouillon M. Environmental arsenic, cadmium and lead dust emissions from metal mine operations: Implications for environmental management, monitoring and human health. *Environ Res*. 2014; 135: 296–303. doi: [10.1016/j.envres.2014.08.036](https://doi.org/10.1016/j.envres.2014.08.036) PMID: [25462679](https://pubmed.ncbi.nlm.nih.gov/25462679/)
44. Taeger D, Pesch B, Kendzia B, Behrens T, Jöckel K-H, Dahmann D, et al. Lung cancer among coal miners, ore miners and quarrymen: smoking-adjusted risk estimates from the synergy pooled analysis of case–control studies. *Scand J Work Environ Health*. 2015; 41: 467–77. doi: [10.5271/sjweh.3513](https://doi.org/10.5271/sjweh.3513) PMID: [26153779](https://pubmed.ncbi.nlm.nih.gov/26153779/)
45. Diez-Roux A V. Bringing context back into Epidemiology: variables and fallacies in multilevel analysis. *Am J Public Health*. 1998; 88: 216–222. PMID: [9491010](https://pubmed.ncbi.nlm.nih.gov/9491010/)
46. Krieger N, Chen JT, Waterman PD, Soobader MJ, Subramanian S V, Carson R. Geocoding and monitoring of US socioeconomic inequalities in mortality and cancer incidence: Does the choice of area-based measure and geographic level matter? The public health disparities geocoding project. *Am J Epidemiol*. 2002; 156: 471–482. doi: [10.1093/aje/kwf068](https://doi.org/10.1093/aje/kwf068) PMID: [12196317](https://pubmed.ncbi.nlm.nih.gov/12196317/)
47. Woods LM, Rachet B, Coleman MP. Choice of geographic unit influences socioeconomic inequalities in breast cancer survival. *Br J Cancer*. 2005; 92: 1279–1282. doi: [10.1038/sj.bjc.6602506](https://doi.org/10.1038/sj.bjc.6602506) PMID: [15798765](https://pubmed.ncbi.nlm.nih.gov/15798765/)
48. Bray F, Tyczynski JE, Parkin DM. Going up or coming down? The changing phases of the lung cancer epidemic from 1967 to 1999 in the 15 European Union countries. *Eur J Cancer*. 2004; 40: 96–125. doi: [10.1016/j.ejca.2003.08.005](https://doi.org/10.1016/j.ejca.2003.08.005) PMID: [14687795](https://pubmed.ncbi.nlm.nih.gov/14687795/)
49. Tyczynski JE, Bray F, Parkin DM. Lung cancer in Europe in 2000: epidemiology, prevention, and early detection. *Lancet Oncol*. 2003; 4: 45–55. PMID: [12517539](https://pubmed.ncbi.nlm.nih.gov/12517539/)

50. Forey B, Hamling J, Hamling J, Thornton A, Lee P. International Smoking Statistics: Belgium. Sutton; 2013.
51. Bayingana K, Demarest S, Gisle L, Tafforeau J, Van Der Heyden J, Van Oyen H. Gezondheidsenquête door middel van Interview, België, 2001. Deel 3: Leefstijl. 2001.
52. Van Loon AJ, Goldbohm RA, Kant IJ, Swaen GM, Kremer AM, van den Brandt PA. Socioeconomic status and lung cancer incidence in men in The Netherlands: is there a role for occupational exposure? *J Epidemiol Community Health*. 1997; 51: 24–9. PMID: [9135784](#)
53. Janssen F, Spiensma AS. The contribution of smoking to regional mortality differences in the Netherlands. *Demogr Res*. 2012; 27: 233–260. doi: [10.4054/DemRes.2012.27.9](#)
54. Kunst AE, Looman CWN, Mackenbach JP. Determinants of regional differences in lung cancer mortality in the Netherlands. *Soc Sci Med*. 1993; 37: 623–631. doi: [10.1016/0277-9536\(93\)90101-9](#) PMID: [8211276](#)
55. Drieskens S, Charafeddine R, Demarest S, Gisle L, Tafforeau J, Van der Heyden J. Health Interview Survey, Belgium, 1997–2001–2004–2008–2013: Health Interview Survey Interactive Analysis. [Internet]. Available: <https://hisia.wiv-isp.be/>
56. Shohaimi S, Ruben R, Wareham N, Day N, Bingham S, Welch A, et al. Residential area deprivation predicts smoking habit independently of individual educational level and occupational social class. A cross sectional study in the Norfolk cohort of the European Investigation into Cancer (EPIC-Norfolk). *J Epidemiol Community Heal*. 2003; 57: 270–276. doi: [10.1136/jech.57.4.270](#)
57. FANC. Where is radon found? (in Dutch) [Internet]. 2014 [cited 24 Nov 2015]. Available: <http://www.fanc.fgov.be/nl/page/646.aspx>
